# Supplementary material for: A genome-wide CRISPR-Cas9 knockout screen identifies FSP1 as the warfarin-resistant vitamin K reductase
Source: PubMed Central journal article supplement (PMC9929328; doi:10.1038/s41467-023-36446-8), 2023-02-14
Supplement: 41467_2023_36446_MOESM3_ESM.pdf [file 41467_2023_36446_MOESM3_ESM.pdf]

## **Description of Additional Supplementary Files**

**Supplementary Data 1** | Enrichment of sgRNA targeting genes related to cell proliferation, apoptosis proteins, and calcium-dependent proteins

**Supplementary Data 2** | Top-hit potential candidates of warfarin-resistant VKR
