# Supplementary material for: A genome-wide CRISPR-Cas9 knockout screen identifies FSP1 as the warfarin-resistant vitamin K reductase
Source: PubMed Central journal article supplement (PMC9929328; doi:10.1038/s41467-023-36446-8), 2023-02-14
Supplement: 41467_2023_36446_MOESM6_ESM.pdf [file 41467_2023_36446_MOESM6_ESM.pdf]

## Reporting Summary

Nature Portfolio wishes to improve the reproducibility of the work that we publish. This form provides structure for consistency and transparency in reporting. For further information on Nature Portfolio policies, see our [Editorial Policies](#) and the [Editorial Policy Checklist](#).

### Statistics

For all statistical analyses, confirm that the following items are present in the figure legend, table legend, main text, or Methods section.

- | n/a                                 | Confirmed                                                                                                                                                                                                                                                                                      |
|-------------------------------------|------------------------------------------------------------------------------------------------------------------------------------------------------------------------------------------------------------------------------------------------------------------------------------------------|
| <input type="checkbox"/>            | <input checked="" type="checkbox"/> The exact sample size ( $n$ ) for each experimental group/condition, given as a discrete number and unit of measurement                                                                                                                                    |
| <input type="checkbox"/>            | <input checked="" type="checkbox"/> A statement on whether measurements were taken from distinct samples or whether the same sample was measured repeatedly                                                                                                                                    |
| <input checked="" type="checkbox"/> | <input type="checkbox"/> The statistical test(s) used AND whether they are one- or two-sided<br><i>Only common tests should be described solely by name; describe more complex techniques in the Methods section.</i>                                                                          |
| <input checked="" type="checkbox"/> | <input type="checkbox"/> A description of all covariates tested                                                                                                                                                                                                                                |
| <input type="checkbox"/>            | <input checked="" type="checkbox"/> A description of any assumptions or corrections, such as tests of normality and adjustment for multiple comparisons                                                                                                                                        |
| <input type="checkbox"/>            | <input checked="" type="checkbox"/> A full description of the statistical parameters including central tendency (e.g. means) or other basic estimates (e.g. regression coefficient) AND variation (e.g. standard deviation) or associated estimates of uncertainty (e.g. confidence intervals) |
| <input checked="" type="checkbox"/> | <input type="checkbox"/> For null hypothesis testing, the test statistic (e.g. $F$ , $t$ , $r$ ) with confidence intervals, effect sizes, degrees of freedom and $P$ value noted<br><i>Give <math>P</math> values as exact values whenever suitable.</i>                                       |
| <input checked="" type="checkbox"/> | <input type="checkbox"/> For Bayesian analysis, information on the choice of priors and Markov chain Monte Carlo settings                                                                                                                                                                      |
| <input checked="" type="checkbox"/> | <input type="checkbox"/> For hierarchical and complex designs, identification of the appropriate level for tests and full reporting of outcomes                                                                                                                                                |
| <input checked="" type="checkbox"/> | <input type="checkbox"/> Estimates of effect sizes (e.g. Cohen's $d$ , Pearson's $r$ ), indicating how they were calculated                                                                                                                                                                    |

*Our web collection on [statistics for biologists](#) contains articles on many of the points above.*

### Software and code

Policy information about [availability of computer code](#)

Data collection Next generation sequencing data collection was performed by Broad Institute Genomic Services. No other software was used in this study for data collection.

Data analysis Coot (version 0.9.6) is a molecular graphics software used to model structures. In this case, to position the cofactors and substrate into the AlphaFold model.  
PyMol (version 2.2.0) was used to generate the cartoon diagrams of the AlphaFold model with cofactors and substrate present.  
GraphPad Prism v9 (GraphPad Software) was used for data analysis of most activity assays.  
Cutadapt v. 2.9 was used for trimming the original sequence from NGS results. Bowtie2 v.2.4.1 was used for sequence alignment, Samtools v.1.13 was used for generating the counts of sgRNA using "idxstats" option.

For manuscripts utilizing custom algorithms or software that are central to the research but not yet described in published literature, software must be made available to editors and reviewers. We strongly encourage code deposition in a community repository (e.g. GitHub). See the Nature Portfolio [guidelines for submitting code & software](#) for further information.

## Data

Policy information about [availability of data](#)

All manuscripts must include a [data availability statement](#). This statement should provide the following information, where applicable:

- Accession codes, unique identifiers, or web links for publicly available datasets
- A description of any restrictions on data availability
- For clinical datasets or third party data, please ensure that the statement adheres to our [policy](#)

AlphaFold model of FSP1 can be found at <https://alphafold.ebi.ac.uk/entry/Q9BRQ8>.

Coordinates for Ndi1 can be found at <https://www.rcsb.org/structure/4G73>.

Coordinates of the superposition of the substrates from coordinates 4G73 into the AlphaFold model are available in the supplementary material.

Tissue specificity of FSP1 gene is available from The Human Protein Atlas Database at <https://www.proteinatlas.org/ENSG00000042286-AIFM2/tissue>.

The raw data and uncropped gel images are available in the Source Data file.

## Human research participants

Policy information about [studies involving human research participants and Sex and Gender in Research](#).

|                             |     |
|-----------------------------|-----|
| Reporting on sex and gender | N/A |
| Population characteristics  | N/A |
| Recruitment                 | N/A |
| Ethics oversight            | N/A |

Note that full information on the approval of the study protocol must also be provided in the manuscript.

## Field-specific reporting

Please select the one below that is the best fit for your research. If you are not sure, read the appropriate sections before making your selection.

- Life sciences     Behavioural & social sciences     Ecological, evolutionary & environmental sciences

For a reference copy of the document with all sections, see [nature.com/documents/nr-reporting-summary-flat.pdf](https://www.nature.com/documents/nr-reporting-summary-flat.pdf)

## Life sciences study design

All studies must disclose on these points even when the disclosure is negative.

|                 |                                                                                                                                                                                                                                                                                                                                                                                             |
|-----------------|---------------------------------------------------------------------------------------------------------------------------------------------------------------------------------------------------------------------------------------------------------------------------------------------------------------------------------------------------------------------------------------------|
| Sample size     | For genome-wide CRISPR-Cas9 screening, sample size was determined based on the library size of sgRNAs to ensure a coverage of >500 cells expressing each sgRNA according to reference 17. For all other experiments, no statistical estimation of sample size was performed, and the sample sizes are chosen because they provide sufficient confidence to assess the experimental results. |
| Data exclusions | No data were excluded from the analysis.                                                                                                                                                                                                                                                                                                                                                    |
| Replication     | Considering the costly next generation sequencing experiment, two independent genome-wide knockout screening were performed. For all cell-based functional studies, triplicates were performed to obtain a confident results and were presented as mean with standard derivation. For western blot analysis, at least two replicates were performed and yielded consistent results.         |
| Randomization   | No randomized experiment was performed in this study.                                                                                                                                                                                                                                                                                                                                       |
| Blinding        | Blinding was not relevant for this study since no group allocation was performed                                                                                                                                                                                                                                                                                                            |

## Reporting for specific materials, systems and methods

We require information from authors about some types of materials, experimental systems and methods used in many studies. Here, indicate whether each material, system or method listed is relevant to your study. If you are not sure if a list item applies to your research, read the appropriate section before selecting a response.

## Materials &amp; experimental systems

| n/a                                 | Involvement                                               |
|-------------------------------------|-----------------------------------------------------------|
| <input type="checkbox"/>            | <input checked="" type="checkbox"/> Antibodies            |
| <input type="checkbox"/>            | <input checked="" type="checkbox"/> Eukaryotic cell lines |
| <input checked="" type="checkbox"/> | <input type="checkbox"/> Palaeontology and archaeology    |
| <input checked="" type="checkbox"/> | <input type="checkbox"/> Animals and other organisms      |
| <input checked="" type="checkbox"/> | <input type="checkbox"/> Clinical data                    |
| <input checked="" type="checkbox"/> | <input type="checkbox"/> Dual use research of concern     |

## Methods

| n/a                                 | Involvement                                     |
|-------------------------------------|-------------------------------------------------|
| <input checked="" type="checkbox"/> | <input type="checkbox"/> ChIP-seq               |
| <input checked="" type="checkbox"/> | <input type="checkbox"/> Flow cytometry         |
| <input checked="" type="checkbox"/> | <input type="checkbox"/> MRI-based neuroimaging |

## Antibodies

|                 |                                                                                                                                                                                                                                                                                                                                                                                                                                                                                                                                                                                                                                                                                                                                                                                                                                                                                                                                                                                                                                                                                                                                                                                                                                                                                                                                                                                                                                                                                                                                                                                                                                                                                                                                                                                                                                                                                                                                                                                                                                                                                                                                                                                                                                                                                                                                                                                                                                                                                                                                                                                                                                                                                                                                                                                                                                                                                                                                                                                             |
|-----------------|---------------------------------------------------------------------------------------------------------------------------------------------------------------------------------------------------------------------------------------------------------------------------------------------------------------------------------------------------------------------------------------------------------------------------------------------------------------------------------------------------------------------------------------------------------------------------------------------------------------------------------------------------------------------------------------------------------------------------------------------------------------------------------------------------------------------------------------------------------------------------------------------------------------------------------------------------------------------------------------------------------------------------------------------------------------------------------------------------------------------------------------------------------------------------------------------------------------------------------------------------------------------------------------------------------------------------------------------------------------------------------------------------------------------------------------------------------------------------------------------------------------------------------------------------------------------------------------------------------------------------------------------------------------------------------------------------------------------------------------------------------------------------------------------------------------------------------------------------------------------------------------------------------------------------------------------------------------------------------------------------------------------------------------------------------------------------------------------------------------------------------------------------------------------------------------------------------------------------------------------------------------------------------------------------------------------------------------------------------------------------------------------------------------------------------------------------------------------------------------------------------------------------------------------------------------------------------------------------------------------------------------------------------------------------------------------------------------------------------------------------------------------------------------------------------------------------------------------------------------------------------------------------------------------------------------------------------------------------------------------|
| Antibodies used | <p>Mouse anti-FIXgla (Green Mountain Antibodies, Clone BC2, #GMA 001)<br/> Rabbit anti-AIFM2/FSP1 (Cell Signaling Technology, #24972)<br/> Rabbit anti-AIFM2 (Sigma, #ZRB1527, Clone 1115, lot Q3709968)<br/> Mouse anti-Fas (Cell Signaling Technology, #8023, clone 4C3)<br/> Mouse anti-Caspase-8 (Cell Signaling Technology, #9746, clone 1C12)<br/> Sheep anti-human Protein C (Affinity Biologicals, SAPC-AP, lot AP3079-ER2)<br/> HRP-conjugated sheep anti-human Protein C (Affinity Biologicals, SAPC-HRP, lot HRP1608-2R1)<br/> HRP-conjugated mouse anti-His (ProteinTech, HRP-66005, Clone 1B7G5, lot 21000118)<br/> Mouse anti-GAPDH (ProteinTech, 60004-1-Ig, Clone 1E6D9, lot 10004129).<br/> Mouse anti-HPC4 (2mg/ml, home-made antibody was a gift from Dr. Esmon's lab at Oklahoma Medical Research Foundation)</p>                                                                                                                                                                                                                                                                                                                                                                                                                                                                                                                                                                                                                                                                                                                                                                                                                                                                                                                                                                                                                                                                                                                                                                                                                                                                                                                                                                                                                                                                                                                                                                                                                                                                                                                                                                                                                                                                                                                                                                                                                                                                                                                                                       |
| Validation      | <p>Mouse anti-FIXgla antibody was validated by Green Mountain Antibodies for ELISA and Western blot. Information available at <a href="https://greenmoab.com/product/gma-001/">https://greenmoab.com/product/gma-001/</a>.</p> <p>Rabbit anti-AIFM2/FSP1 antibody was validated by Cell Signaling Technology for Western blot. Information available at <a href="https://www.cellsignal.com/products/primary-antibodies/aifm2-fsp1-antibody/24972">https://www.cellsignal.com/products/primary-antibodies/aifm2-fsp1-antibody/24972</a>.</p> <p>Rabbit anti-AIFM2 antibody was validated by Sigma for immunocytochemistry, Western blot, affinity binding assay, and flow cytometry. Full information available at <a href="https://www.sigmaaldrich.com/US/en/product/sigma/zrb1527">https://www.sigmaaldrich.com/US/en/product/sigma/zrb1527</a>.</p> <p>Mouse anti-Fas antibody was validated by Cell Signaling Technology for Western blot, immunofluorescent analysis, and flow cytometric analysis. Full information available at <a href="https://www.cellsignal.com/products/primary-antibodies/fas-4c3-mouse-mab/8023">https://www.cellsignal.com/products/primary-antibodies/fas-4c3-mouse-mab/8023</a>.</p> <p>Mouse anti-Caspase-8 antibody was validated by Cell Signaling Technology for Western blot. Full information available at <a href="https://www.cellsignal.com/products/primary-antibodies/caspase-8-1c12-mouse-mab/9746">https://www.cellsignal.com/products/primary-antibodies/caspase-8-1c12-mouse-mab/9746</a>.</p> <p>Sheep anti-human Protein C polyclonal antibody and its HRP conjugate was validated by Affinity Biologicals for Species Cross Reactivity. Full information available at <a href="https://affinitybiologicals.com/species-cross-reactivity/">https://affinitybiologicals.com/species-cross-reactivity/</a>.</p> <p>HRP-conjugated mouse anti-His antibody was validated by ProteinTech for Western blot. Information available at <a href="https://www.ptglab.com/products/6-His,-His-Tag-Antibody-HRP-66005.htm">https://www.ptglab.com/products/6-His,-His-Tag-Antibody-HRP-66005.htm</a>.</p> <p>Mouse anti-GAPDH antibody was validated by ProteinTech for Western blot, immunoprecipitation, immunofluorescent analysis, and flow cytometry. Full information available at <a href="https://www.ptglab.com/products/GAPDH-Antibody-60004-1-Ig.htm">https://www.ptglab.com/products/GAPDH-Antibody-60004-1-Ig.htm</a>.</p> <p>Mouse anti-HPC4 monoclonal antibody recognizes a 12 amino acid sequence (EDQVDPRLIDGK) is now commercially available from GenScript that has been validated for Western blot, immunoprecipitation, flow cytometry, immunocytochemistry/immunofluorescence, and ELISA. Full information available at <a href="https://www.genscript.com/antibody/A01774-THE_Protein_C_Tag_Antibody_HPC4_mAb_Mouse.html">https://www.genscript.com/antibody/A01774-THE_Protein_C_Tag_Antibody_HPC4_mAb_Mouse.html</a>.</p> |

## Eukaryotic cell lines

Policy information about [cell lines and Sex and Gender in Research](#)

|                                                                   |                                                                                                                                                                          |
|-------------------------------------------------------------------|--------------------------------------------------------------------------------------------------------------------------------------------------------------------------|
| Cell line source(s)                                               | The human embryonic kidney 293 cell (HEK293) was obtained from ATCC (#CRL-1573).                                                                                         |
| Authentication                                                    | The HEK293 cell line used in this study has been verified by the Tissue Culture Facility of the University of North Carolina at Chapel Hill.                             |
| Mycoplasma contamination                                          | All cell lines used in this study were tested negative for mycoplasma contamination.                                                                                     |
| Commonly misidentified lines (See <a href="#">ICLAC</a> register) | No cross-contamination was reported for HEK293 cell line used in this study according to the Tissue Culture Facility of the University of North Carolina at Chapel Hill. |
